# Supplementary material for: Co-culture of benzalkonium chloride promotes the biofilm formation and decreases the antibiotic susceptibility of a Pseudomonas aeruginosa strain
Source: Royal Society of Chemistry journal article supplement (doi:10.1039/d4em00035h), 2024-01-01
Supplement: d4em00035h1.pdf [file d4em00035h1.pdf]

Table S1. The antibiotics used for the disk diffusion assay and inhibition zone diameters of strain Jade-X in the presence/absence of BAC

| Sensitivity                 | No.      | Name             | Concentration/slice | Abbreviation | Plate 1 (cm) | Plate 2 (cm) | Plate 3 (cm) | Average (cm) | ±    |
|-----------------------------|----------|------------------|---------------------|--------------|--------------|--------------|--------------|--------------|------|
| Increase                    | 1        | ciprofloxacin    | 5 µg                | CIP(+)       | 2.4          | 2.2          | 2.0          | 2.20         | 0.16 |
|                             |          |                  |                     | CIP          | 3            | 2.8          | 2.9          | 2.90         | 0.08 |
|                             | 2        | levofloxacin     | 5 µg                | LEV(+)       | 1.7          | 1.8          | 1.8          | 1.77         | 0.05 |
|                             |          |                  |                     | LEV          | 2.3          | 2.5          | 1.9          | 2.23         | 0.25 |
|                             | 3        | tetracycline     | 30 µg               | TET(+)       | 0.7          | 0.9          | 0.8          | 0.80         | 0.08 |
|                             |          |                  |                     | TET          | 0.9          | 1.1          | 1.3          | 1.10         | 0.16 |
|                             | 4        | norfloxacin      | 10 µg               | NOR(+)       | 1.6          | 1.6          | 1.7          | 1.63         | 0.05 |
|                             |          |                  |                     | NOR          | 2.5          | 2.4          | 2.3          | 2.40         | 0.08 |
| Decrease                    | 5        | ceftriaxone      | 30 µg               | CTR(+)       | 1.7          | 1.8          | 2            | 1.83         | 0.12 |
|                             |          |                  |                     | CTR          | 1.4          | 1.5          | 1.5          | 1.47         | 0.05 |
|                             | 6        | polymyxin B      | 300 IU              | PB(+)        | 2.1          | 2            | 1.8          | 1.97         | 0.12 |
|                             |          |                  |                     | PB           | 1.6          | 1.5          | 1.4          | 1.50         | 0.08 |
| No influence                | 7        | imipenem         | 10 µg               | IPM(+)       | 2.1          | 2            | 2.1          | 2.07         | 0.05 |
|                             |          |                  |                     | IPM          | 2            | 2.1          | 2.0          | 2.03         | 0.05 |
|                             | 8        | piperacillin     | 100 µg              | PIP(+)       | 2.7          | 2.4          | 2.8          | 2.63         | 0.17 |
|                             |          |                  |                     | PIP          | 2.8          | 2.5          | 2.4          | 2.57         | 0.17 |
|                             | 9        | gentamicin       | 10 µg               | GEN(+)       | 1.3          | 1.1          | 1.2          | 1.20         | 0.08 |
|                             |          |                  |                     | GEN          | 1.1          | 1.2          | 1.2          | 1.17         | 0.05 |
|                             | 10       | cefoperazone     | 75 µg               | CPZ(+)       | 2.2          | 2.0          | 2.0          | 2.07         | 0.09 |
|                             |          |                  |                     | CPZ          | 2            | 2            | 2.3          | 2.10         | 0.14 |
|                             | 11       | doxycycline      | 30 µg               | DO(+)        | 1.4          | 1.5          | 0.7          | 1.20         | 0.36 |
|                             |          |                  |                     | DO           | 1.3          | 1            | 1.3          | 1.20         | 0.14 |
|                             | 12       | ceftazidime      | 30 µg               | CAZ(+)       | 2.5          | 2.6          | 2.7          | 2.60         | 0.08 |
|                             |          |                  |                     | CAZ          | 2.4          | 2.6          | 2.5          | 2.50         | 0.08 |
|                             | 13       | minocycline      | 30 µg               | MI(+)        | 1.3          | 1.5          | 1.1          | 1.30         | 0.16 |
|                             |          |                  |                     | MI           | 1.2          | 1.3          | 1.2          | 1.23         | 0.05 |
| 14                          | amikacin | 30 µg            | AMK(+)              | 1.5          | 1.6          | 1.6          | 1.57         | 0.05         |      |
|                             |          |                  | AMK                 | 1.5          | 1.7          | 1.4          | 1.53         | 0.12         |      |
| No inhibitory zone diameter | 15       | oxacillin        | 1 µg                | OX(+)        | 0            | 0            | 0            | 0            | 0    |
|                             |          |                  |                     | OX           | 0            | 0            | 0            | 0            | 0    |
|                             | 16       | florfenicol      | 30 µg               | FFC(+)       | 0            | 0            | 0            | 0            | 0    |
|                             |          |                  |                     | FFC          | 0            | 0            | 0            | 0            | 0    |
|                             | 17       | azithromycin     | 15 µg               | AZI(+)       | 0            | 0            | 0            | 0            | 0    |
|                             |          |                  |                     | AZI          | 0            | 0            | 0            | 0            | 0    |
|                             | 18       | sulfamethoxazole | 25 µg               | SXT(+)       | 0            | 0            | 0            | 0            | 0    |
|                             |          |                  |                     | SXT          | 0            | 0            | 0            | 0            | 0    |
|                             | 19       | clindamycin      | 2 µg                | CC(+)        | 0            | 0            | 0            | 0            | 0    |

|    |                   |       |        |   |   |   |   |   |
|----|-------------------|-------|--------|---|---|---|---|---|
|    |                   |       | CC     | 0 | 0 | 0 | 0 | 0 |
| 20 | chloramphenicol   | 30 µg | C(+)   | 0 | 0 | 0 | 0 | 0 |
|    |                   |       | C      | 0 | 0 | 0 | 0 | 0 |
| 21 | cefazolin         | 30 µg | CZ(+)  | 0 | 0 | 0 | 0 | 0 |
|    |                   |       | CCC    | 0 | 0 | 0 | 0 | 0 |
| 22 | ampicillin        | 10 µg | AMP(+) | 0 | 0 | 0 | 0 | 0 |
|    |                   |       | AMP    | 0 | 0 | 0 | 0 | 0 |
| 23 | kanamycin         | 30 µg | KAN(+) | 0 | 0 | 0 | 0 | 0 |
|    |                   |       | KAN    | 0 | 0 | 0 | 0 | 0 |
| 24 | penicillin        | 10 U  | PEN(+) | 0 | 0 | 0 | 0 | 0 |
|    |                   |       | PEN    | 0 | 0 | 0 | 0 | 0 |
| 25 | streptomycin      | 10 µg | S(+)   | 0 | 0 | 0 | 0 | 0 |
|    |                   |       | S      | 0 | 0 | 0 | 0 | 0 |
| 26 | erythrocin        | 15 µg | E(+)   | 0 | 0 | 0 | 0 | 0 |
|    |                   |       | E      | 0 | 0 | 0 | 0 | 0 |
| 27 | cefuroxime sodium | 30 µg | CXM(+) | 0 | 0 | 0 | 0 | 0 |
|    |                   |       | CXM    | 0 | 0 | 0 | 0 | 0 |
| 28 | lincomycin        | 2 µg  | MY(+)  | 0 | 0 | 0 | 0 | 0 |
|    |                   |       | MY     | 0 | 0 | 0 | 0 | 0 |
| 29 | cefalexin         | 30 µg | CN(+)  | 0 | 0 | 0 | 0 | 0 |
|    |                   |       | CN     | 0 | 0 | 0 | 0 | 0 |

Table S2. List of functional genes and qRT-PCR primers used in this study

| <b>Number</b> | <b>Gene tag</b> | <b>Name</b> | <b>Forward Sequence (5'-3')</b> | <b>Reverse Sequence (5'-3')</b> | <b>Gene annotation</b>                                               |
|---------------|-----------------|-------------|---------------------------------|---------------------------------|----------------------------------------------------------------------|
| 1             | 15670           | <i>mexX</i> | AATCCGCATCG<br>CGAATTGCT        | CTGTGGGTTGA<br>CCACCTTGA        | multidrug efflux RND transporter periplasmic adaptor subunit MexX    |
| 2             | 15675           | <i>mexY</i> | TCGCCGTGATGT<br>ACCTGTTC        | ACGTTGATCGA<br>GAAGCCCAG        | multidrug efflux RND transporter permease subunit MexY               |
| 3             | 6515            | <i>mexJ</i> | GTGTCGGTTCGA<br>ACTCTGGTC       | CAAGGGAACCG<br>ATAACGGCA        | multidrug efflux RND transporter periplasmic adaptor subunit MexJ    |
| 4             | 6520            | <i>mexK</i> | CATCCTGGTGCT<br>GGGTAAGG        | AAGAAGCTCAC<br>CAGCAGGAC        | multidrug efflux RND transporter permease subunit MexK               |
| 5             | 7290            | <i>mexP</i> | GCAACTGGATC<br>TCGGCTTCA        | ACGCCATTGGT<br>GACGTAGTT        | multidrug efflux RND transporter periplasmic adaptor subunit MexP    |
| 6             | 7295            | <i>mexQ</i> | GCAGTGACTA<br>CCGCCTATC         | GATGTGCTGGT<br>CGAAGGTGA        | multidrug efflux RND transporter permease subunit MexQ               |
| 7             | 7300            | <i>opmE</i> | CGGCAATCTCG<br>ATGCTTTGG        | AGTACCGTCCG<br>TTCGTAGAG        | multidrug efflux transporter outer membrane subunit OpmE             |
| 8             | 19170           | <i>mexN</i> | CGCAGGACATC<br>AACCTCAGT        | TTGGACACATC<br>CATCAGCCC        | multidrug efflux RND transporter permease subunit MexN               |
| 9             | 19175           | <i>mexM</i> | GCTGACCATCG<br>ACAACCAGA        | CTTTGCTCGACA<br>GCACCAAC        | multidrug efflux RND transporter periplasmic adaptor subunit MexM    |
| 10            | 13140           | <i>muxA</i> | AACCAGGCGCA<br>ACTGAAGAA        | GGTATCCAGGG<br>TCTGCTTGG        | multidrug efflux RND transporter periplasmic adaptor subunit MuxA    |
| 11            | 13145           | <i>muxB</i> | CCTGATTTCCGG<br>CTTCGTCT        | TACTGTGCGATC<br>AGGCCATC        | multidrug efflux RND transporter permease subunit MuxB               |
| 12            | 13150           | <i>muxC</i> | CTGCCAACGTC<br>GATTTTCC         | CGATGTCTTCT<br>CCAGGTCCG        | multidrug efflux RND transporter permease subunit MuxC               |
| 13            | 13155           | <i>opmB</i> | TATTTCCCCGAC<br>CTCACCT         | GAACAGGGTCA<br>TGCGAACT         | multidrug efflux RND transporter outer membrane subunit OpmB         |
| 14            | 24085           | <i>mexV</i> | AAGGCCATCTC<br>GAAAAGCGA        | TGGAAAGGTCC<br>TGCAAGGTG        | multidrug efflux RND transporter periplasmic adaptor subunit MexV    |
| 15            | 24090           | <i>mexW</i> | GAAGTGGTGAA<br>GACCCTCGG        | TCATCGACAGC<br>GGAATGGTC        | multidrug efflux RND transporter permease subunit MexW               |
| 16            | 815             | <i>triA</i> | TCATTCCAAAG<br>GTCGCTGGT        | GAATCGGCCA<br>TCTCACCG          | triclosan efflux RND transporter adaptor protein TriA                |
| 17            | 820             | <i>triB</i> | TCGTCGATGGG<br>AAACAGTCC        | CGAGTTTGTATCT<br>TCTGGCCG       | triclosan efflux RND transporter adaptor protein TriB                |
| 18            | 825             | <i>triC</i> | TCGTCCAGCACC<br>AGTTCTTC        | TCTCGTGGATGC<br>TGCTGTTT        | triclosan efflux RND transporter permease subunit TriC               |
| 19            | 27215           | <i>motB</i> | CTGCAGCCGTAT<br>TTCGAGGA        | GATAGCTCCCA<br>GTTGCCGAA        | flagellar motor protein MotB                                         |
| 20            | 24865           | <i>pilB</i> | AACAGCCTGGA<br>TCGGGAAAG        | GGTCGGAGAGA<br>CCGATGAAC        | type IV-A pilus assembly ATPase PilB                                 |
| 21            | 27655           | <i>pilQ</i> | CAAGGACGGCA<br>ATATCGGGA        | ACAGTTGCAGG<br>TCGAGGATG        | type 4a pilus secretin PilQ                                          |
| 22            | 3800            | <i>opmD</i> | TTCTTCGACGAT<br>CCGCAACT        | TCCAGCTGTTGT<br>TCGATGCT        | multidrug efflux transporter outer membrane subunit OpmD             |
| 23            | 3805            | <i>mexI</i> | CGAGCCGATGT<br>TCTCTCCA         | GTACTGCCCTT<br>CACCATCC         | multidrug efflux RND transporter permease MexI                       |
| 24            | 3810            | <i>mexH</i> | CGGTACCTATA<br>CCGCCTAC         | CTGGAGGATTT<br>CCACGCGAC        | multidrug efflux RND transporter periplasmic adaptor MexH            |
| 25            | 3815            | <i>mexG</i> | GTCCACACCTTC<br>TGGAGCAA        | TCAGGCCTTCTG<br>GTAGGTGG        | multidrug efflux RND transporter inhibitory subunit MexG             |
| 26            | 2160            | <i>mexA</i> | AGGAAGGCGTC<br>AAGCAGAAG        | TCGGTAACCAG<br>CCACTTGTC        | multidrug efflux RND transporter periplasmic adaptor subunit MexA    |
| 27            | 2165            | <i>mexB</i> | CAGGAGCTTGC<br>TGCTCTACC        | ATCCGTACCA<br>GCATCCACG         | multidrug efflux RND transporter permease subunit MexB               |
| 28            | 2170            | <i>oprM</i> | CGCGAAGATCC<br>AGAAGGACA        | GAGCTGGTAGT<br>ACTCGTCGC        | multidrug efflux RND transporter outer membrane channel subunit OprM |
| 29            | 25250           | <i>oprJ</i> | CGACACGCTGG<br>ATTGGAAGA        | AGCGAGCGGTT<br>GTTATCCAG        | multidrug efflux transporter outer membrane subunit OprJ             |
| 30            | 25255           | <i>mexD</i> | CAACGACTTCA<br>CCAATGCGG        | TCCCATTTACG<br>CTGACGAA         | multidrug efflux RND transporter permease subunit MexD               |

|    |           |             |                           |                          |                                                                      |
|----|-----------|-------------|---------------------------|--------------------------|----------------------------------------------------------------------|
| 31 | 2526<br>0 | <i>mexC</i> | AATAGGAAGGA<br>TCGGGGCGT  | CTCCACCGGCA<br>ACACCATTT | multidrug efflux RND transporter<br>periplasmic adaptor subunit MexC |
| 32 | 1331<br>0 | <i>oprN</i> | GGGTCTGTTTCAG<br>TCTGCTGG | TTCGACCAACT<br>GGTTCAGGG | multidrug efflux RND transporter outer<br>membrane subunit OprN      |
| 33 | 1331<br>5 | <i>mexF</i> | AGATCGGCCAG<br>TTGAAGGTG  | TTGAGTTCGGC<br>GGTGATGAA | multidrug efflux RND transporter<br>permease subunit MexF            |
| 34 | 1332<br>0 | <i>mexE</i> | TGATCAAGGAC<br>GAAGCGGTC  | TGCGGTAGACG<br>GTCTTGTTG | multidrug efflux RND transporter<br>periplasmic adaptor subunit MexE |
| 35 | 1919<br>0 | <i>lasI</i> | GTGTTCAAGGA<br>GCGCAAAGG  | ATTCGCCAGCA<br>ACCGAAAAC | acyl-homoserine-lactone synthase LasI                                |
| 36 | 1920<br>0 | <i>lasR</i> | ATCCTGCAGAA<br>GATGGCGAG  | GGGTAGTTGCC<br>GACGATGAA | transcriptional regulator LasR                                       |
| 37 | 7420      | <i>rhlR</i> | GTTTGCCTAGCG<br>AGATGCAG  | GCGTAGTAAT<br>CGAAGCCCA  | transcriptional regulator RhlR                                       |
| 38 | 7425      | <i>rhlI</i> | TTCGACCAGTTC<br>GACCATCC  | TAACGCGAAAG<br>CTCCAGAC  | acyl-homoserine-lactone synthase                                     |
| 39 | 2149<br>5 | <i>pqsB</i> | GAAGATTGGCC<br>ATCCGTTGC  | GACTCGCTGTCC<br>ACTTCCAA | 2-heptyl-4(1H)-quinolone synthase<br>subunit PqsB                    |
| 40 | 2150<br>0 | <i>pqsA</i> | GCAATACACCT<br>CGGGTTCCA  | CCCATGCCATA<br>GCCGAAGAA | anthranilate--CoA ligase                                             |
| 41 | 1385<br>0 | <i>pvdQ</i> | GGCCATTTCGG<br>GGTCTACAA  | CTGGACTGGGA<br>GAAAGCCAG | acyl-homoserine lactone acylase PvdQ                                 |
| 42 | 6660      | <i>bamA</i> | CGAAGAAGACC<br>TGACCGACC  | CCAGGTAATAG<br>GAGCGCAGG | outer membrane protein assembly factor<br>BamA                       |
| 43 | 5880      | <i>bamB</i> | ATGGTTCAGC<br>ATCTACGCC   | TCCACTTCTTCT<br>TGCCGGTG | outer membrane protein assembly factor<br>BamB                       |
| 44 | 3790      | <i>phzA</i> | GGGCTATTGCG<br>AGAACCACT  | GCTATTCCCAAT<br>GCACGCAG | phenazine biosynthesis protein PhzA                                  |
| 45 | 3785      | <i>phzB</i> | TGGCAAAGACA<br>AACTTGCGG  | ATGATTGGGGT<br>CGTCGGTTC | phenazine biosynthesis protein PhzB                                  |
| 46 | 1923<br>5 | <i>bdlA</i> | CATACCCTGTCC<br>ACCGAGAC  | ATCTGTTGCGA<br>GTGCTGTGA | biofilm dispersion protein BdlA                                      |
| 47 | 2105<br>5 | <i>flgE</i> | ACAACCTCGTCCT<br>CTTCGCTG | GTCCGGCTCGTT<br>CTTGATGA | flagellar hook protein FlgE                                          |
| 48 | 2106<br>0 | <i>flgD</i> | TCGCTGAACAA<br>GAGCATGGA  | ACGTTGACCCA<br>TACGTTGCT | flagellar hook assembly protein FlgD                                 |
| 49 |           | 16S<br>rRNA | TGCCTGGTAGTG<br>GGGGATAA  | TCTGATAGCGT<br>GAGGTCCGA | reference gene                                                       |

Table S3. The antibiotic resistance genes of strain Jade-X analyzed using the comprehensive antibiotic resistance database

| ORF_ID     | Resistance Mechanism | AMR Gene Family                                                  |
|------------|----------------------|------------------------------------------------------------------|
| 1_orf01260 | antibiotic efflux    | major facilitator superfamily (MFS) antibiotic efflux pump       |
| 1_orf01762 | antibiotic efflux    | major facilitator superfamily (MFS) antibiotic efflux pump       |
| 1_orf05870 | antibiotic efflux    | multidrug and toxic compound extrusion (MATE) transporter        |
| 1_orf01913 | antibiotic efflux    | resistance-nodulation-cell division (RND) antibiotic efflux pump |
| 1_orf00675 | antibiotic efflux    | resistance-nodulation-cell division (RND) antibiotic efflux pump |
| 1_orf00676 | antibiotic efflux    | resistance-nodulation-cell division (RND) antibiotic efflux pump |
| 1_orf07533 | antibiotic efflux    | resistance-nodulation-cell division (RND) antibiotic efflux pump |
| 1_orf07530 | antibiotic efflux    | resistance-nodulation-cell division (RND) antibiotic efflux pump |
| 1_orf03951 | antibiotic efflux    | resistance-nodulation-cell division (RND) antibiotic efflux pump |
| 1_orf03949 | antibiotic efflux    | resistance-nodulation-cell division (RND) antibiotic efflux pump |
| 1_orf01149 | antibiotic efflux    | resistance-nodulation-cell division (RND) antibiotic efflux pump |
| 1_orf01146 | antibiotic efflux    | resistance-nodulation-cell division (RND) antibiotic efflux pump |
| 1_orf01145 | antibiotic efflux    | resistance-nodulation-cell division (RND) antibiotic efflux pump |
| 1_orf01974 | antibiotic efflux    | resistance-nodulation-cell division (RND) antibiotic efflux pump |
| 1_orf01975 | antibiotic efflux    | resistance-nodulation-cell division (RND) antibiotic efflux pump |
| 1_orf01973 | antibiotic efflux    | resistance-nodulation-cell division (RND) antibiotic efflux pump |
| 1_orf05747 | antibiotic efflux    | resistance-nodulation-cell division (RND) antibiotic efflux pump |
| 1_orf05744 | antibiotic efflux    | resistance-nodulation-cell division (RND) antibiotic efflux pump |
| 1_orf02211 | antibiotic efflux    | resistance-nodulation-cell division (RND) antibiotic efflux pump |
| 1_orf02212 | antibiotic efflux    | resistance-nodulation-cell division (RND) antibiotic efflux pump |
| 1_orf03953 | antibiotic efflux    | resistance-nodulation-cell division (RND) antibiotic efflux pump |
| 1_orf03952 | antibiotic efflux    | resistance-nodulation-cell division (RND) antibiotic efflux pump |
| 1_orf07192 | antibiotic efflux    | resistance-nodulation-cell division (RND) antibiotic efflux pump |
| 1_orf07195 | antibiotic efflux    | resistance-nodulation-cell division (RND) antibiotic efflux pump |
| 1_orf04719 | antibiotic efflux    | resistance-nodulation-cell division (RND) antibiotic efflux pump |
| 1_orf04716 | antibiotic efflux    | resistance-nodulation-cell division (RND) antibiotic efflux pump |
| 1_orf03892 | antibiotic efflux    | resistance-nodulation-cell division (RND) antibiotic efflux pump |
| 1_orf03894 | antibiotic efflux    | resistance-nodulation-cell division (RND) antibiotic efflux pump |
| 1_orf03897 | antibiotic efflux    | resistance-nodulation-cell division (RND) antibiotic efflux pump |
| 1_orf01911 | antibiotic efflux    | resistance-nodulation-cell division (RND) antibiotic efflux pump |
| 1_orf02127 | antibiotic efflux    | resistance-nodulation-cell division (RND) antibiotic efflux pump |
| 1_orf03898 | antibiotic efflux    | resistance-nodulation-cell division (RND) antibiotic efflux pump |
| 1_orf01144 | antibiotic efflux    | resistance-nodulation-cell division (RND) antibiotic efflux pump |
| 1_orf02214 | antibiotic efflux    | resistance-nodulation-cell division (RND) antibiotic efflux pump |
| 1_orf08139 | antibiotic efflux    | resistance-nodulation-cell division (RND) antibiotic efflux pump |
| 1_orf07529 | antibiotic efflux    | resistance-nodulation-cell division (RND) antibiotic efflux pump |
| 1_orf00678 | antibiotic efflux    | resistance-nodulation-cell division (RND) antibiotic efflux pump |
| 1_orf03946 | antibiotic efflux    | resistance-nodulation-cell division (RND) antibiotic efflux pump |
| 1_orf02683 | antibiotic efflux    | resistance-nodulation-cell division (RND) antibiotic efflux pump |
| 1_orf00253 | antibiotic efflux    | resistance-nodulation-cell division (RND) antibiotic efflux pump |

|            |                              |                                                                                                                                                                                  |
|------------|------------------------------|----------------------------------------------------------------------------------------------------------------------------------------------------------------------------------|
| 1_orf00255 | antibiotic efflux            | resistance-nodulation-cell division (RND) antibiotic efflux pump                                                                                                                 |
| 1_orf00257 | antibiotic efflux            | resistance-nodulation-cell division (RND) antibiotic efflux pump                                                                                                                 |
| 1_orf07534 | antibiotic efflux            | resistance-nodulation-cell division (RND) antibiotic efflux pump                                                                                                                 |
| 1_orf08166 | antibiotic efflux            | small multidrug resistance (SMR) antibiotic efflux pump                                                                                                                          |
| 1_orf01287 | antibiotic inactivation      | APH(3')                                                                                                                                                                          |
| 1_orf06970 | antibiotic inactivation      | chloramphenicol acetyltransferase (CAT)                                                                                                                                          |
| 1_orf06247 | antibiotic inactivation      | fosfomycin thiol transferase                                                                                                                                                     |
| 1_orf09017 | antibiotic inactivation      | OXA beta-lactamase                                                                                                                                                               |
| 1_orf01304 | antibiotic inactivation      | PDC beta-lactamase                                                                                                                                                               |
| 1_orf02165 | antibiotic target alteration | pmr phosphoethanolamine transferase                                                                                                                                              |
| 1_orf07816 | antibiotic target alteration | pmr phosphoethanolamine transferase                                                                                                                                              |
| 1_orf07818 | antibiotic target alteration | pmr phosphoethanolamine transferase                                                                                                                                              |
| 1_orf04316 | antibiotic efflux            | resistance-nodulation-cell division (RND) antibiotic efflux pump; ATP-binding cassette (ABC) antibiotic efflux pump; major facilitator superfamily (MFS) antibiotic efflux pump; |
| 1_orf00674 | antibiotic efflux            | resistance-nodulation-cell division (RND) antibiotic efflux pump                                                                                                                 |

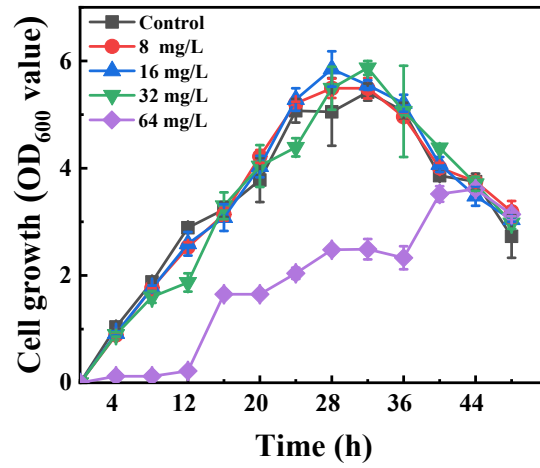

Fig. S1 The growth curves of strain Jade-X cultured in flasks (100 mL medium in 250 mL flask) at 30°C and 150 rpm

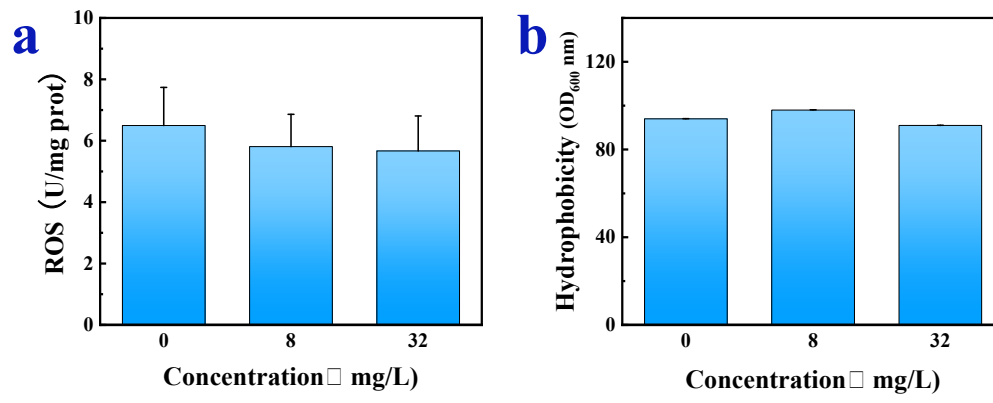

Fig. S2 Effects of BAC on ROS production (a) and hydrophobicity (b)



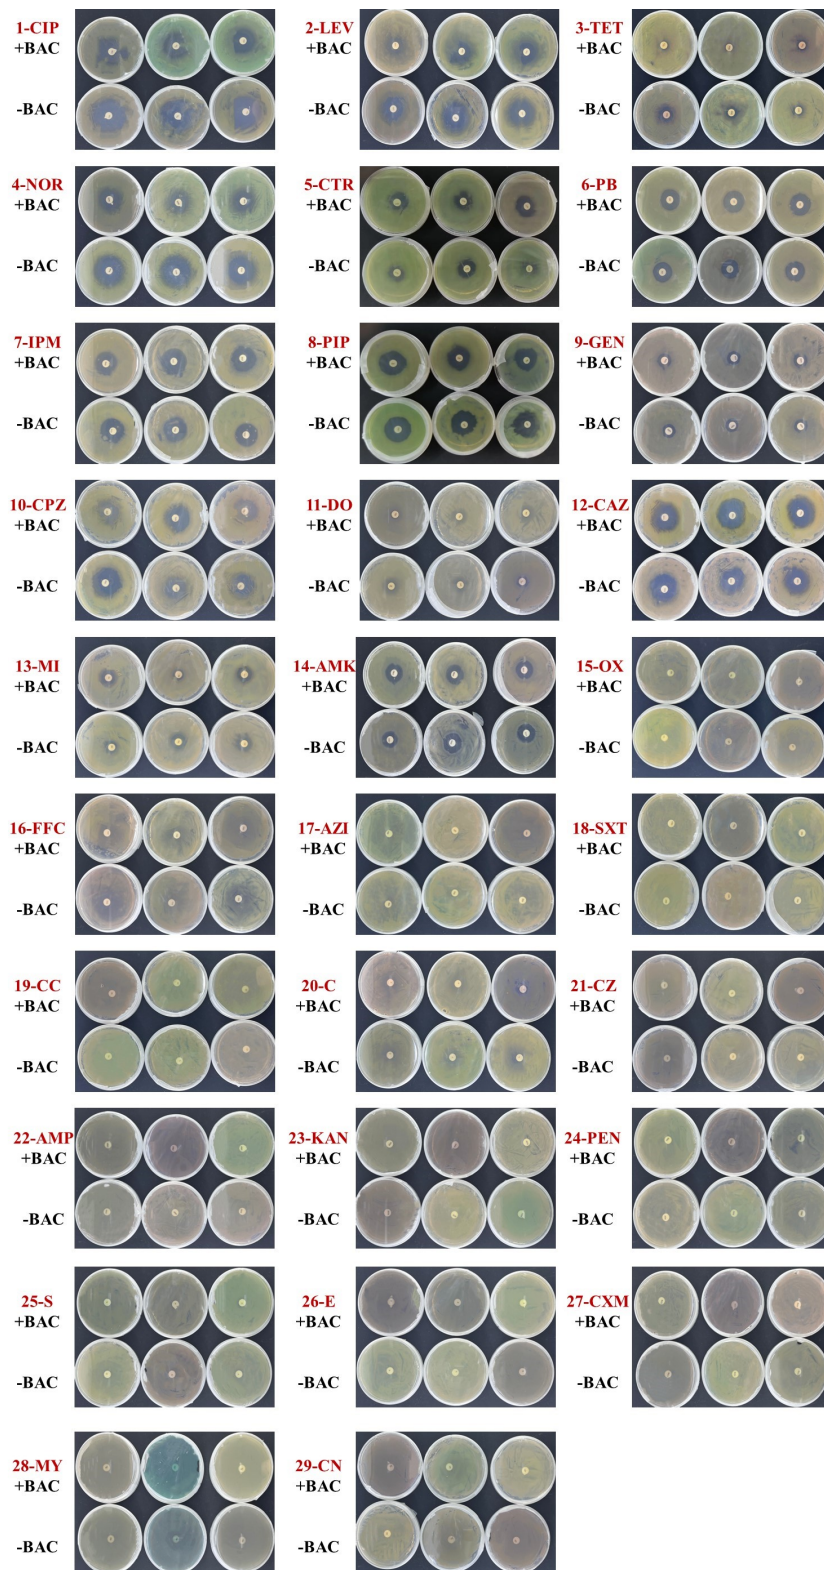

Fig. S3 Antibiotics sensitivity assay of strain Jade-X. BAC concentration was 8 mg/L, and strain was incubated at 30°C for 48 h

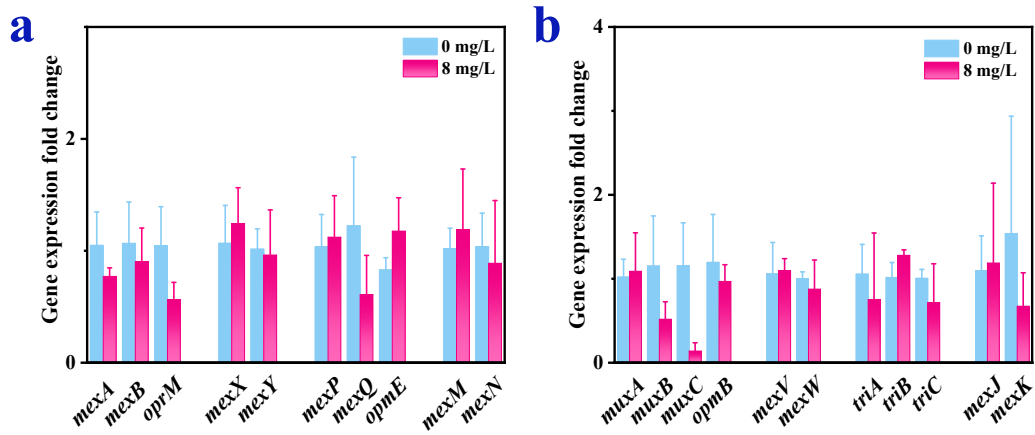

Fig. S4 The expression patterns of RND efflux-related genes of strain Jade-X in response to 8 mg/L BAC
